# Supplementary material for: Evolution of Patterns of Care and Outcomes in the Real-Life Setting for Patients with Metastatic GIST Treated in Three French Expert Centers over Three Decades
Source: MDPI journal article supplement (doi:10.3390/cancers15174306), 2023-08-28
Supplement: s1 [file s1]

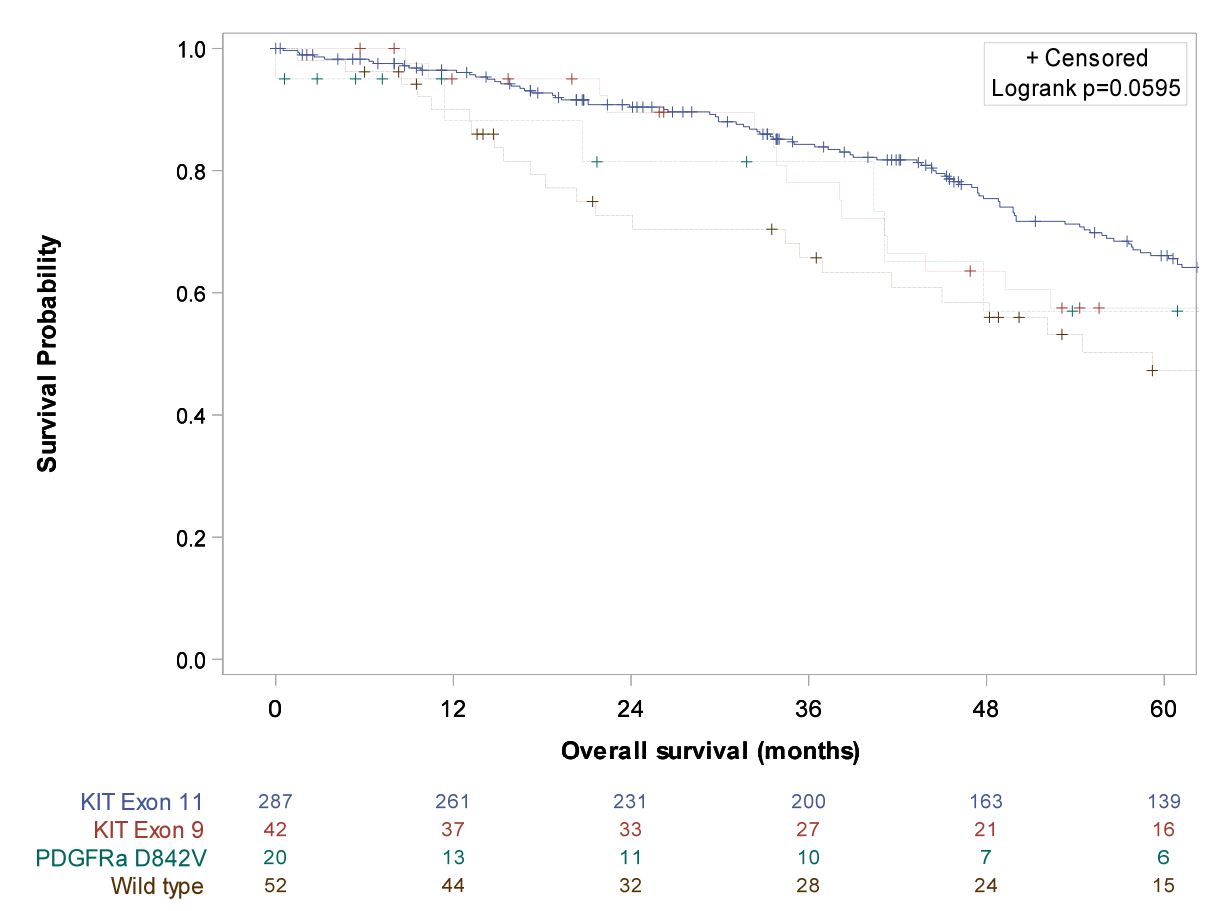

**Supplementary Figure S1.** Kaplan-Meier curve of overall survival in the metastatic setting according to main molecular subgroups (N = 401).

Median OS in the metastatic setting in the KIT exon 11 mutation subgroup (n = 287), the KIT Exon 9 subgroup (n = 42), the PDGFRa D842V subgroup (n = 20) and the wild type subgroup (n = 52).

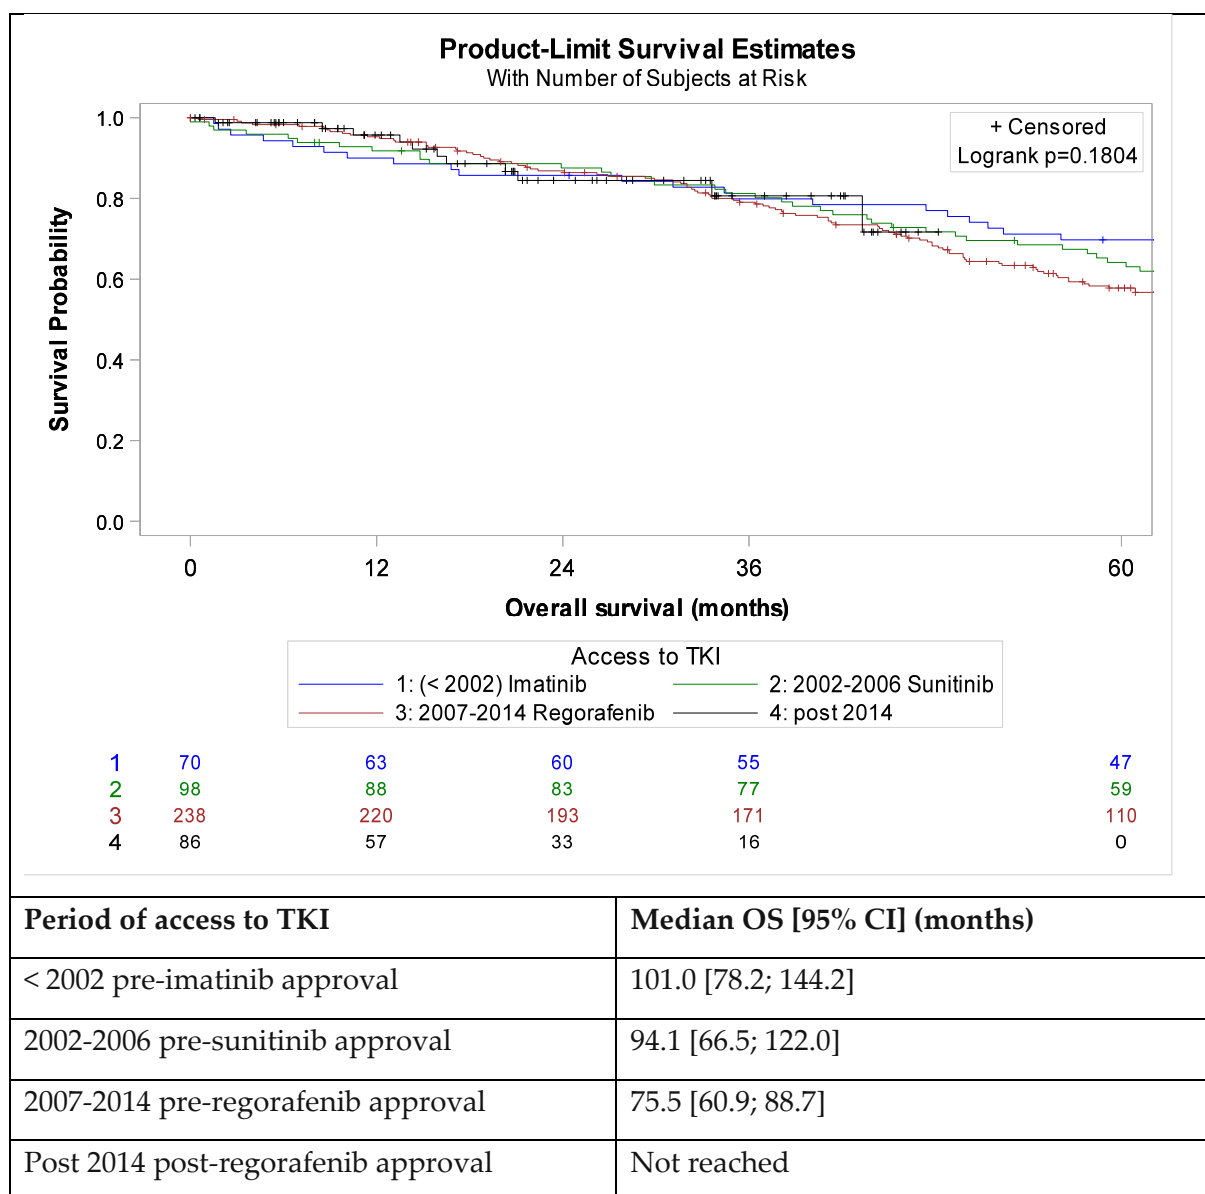

**Supplementary Figure S2.** Kaplan-Meier curve of overall survival of patients with metastatic GIST treated in three French expert centers according to therapeutic periods with different access to TKI (n = 492)

**Supplementary Table S1.** Description of baseline characteristics of patients who received imatinib (n = 384) or another molecule ( n = 77) as first-line treatment in the metastatic setting.

|                                                 | <b>Imatinib<br/>(n=384)</b> |          | <b>Other<br/>(n=77)</b> |          |
|-------------------------------------------------|-----------------------------|----------|-------------------------|----------|
|                                                 | <b>n</b>                    | <b>%</b> | <b>n</b>                | <b>%</b> |
| <b>Sex</b>                                      |                             |          |                         |          |
| Male                                            | 226                         | 58.9     | 49                      | 63.6     |
| Female                                          | 158                         | 41.1     | 28                      | 36.4     |
| <b>Median age at diagnosis, years (min-max)</b> | 59                          | (19-93)  | 55                      | (25-84)  |
| <b>Tumour site</b>                              |                             |          |                         |          |
| Stomach                                         | 156                         | 40.6     | 32                      | 41.6     |
| Small intestine                                 | 151                         | 39.3     | 30                      | 39.0     |
| Duodenum                                        | 18                          | 4.7      | 5                       | 6.5      |
| Rectum                                          | 19                          | 4.9      | 4                       | 5.2      |
| Peritoneum                                      | 16                          | 4.2      | 3                       | 3.9      |
| Colon                                           | 16                          | 4.2      | 1                       | 1.3      |
| Oesophagus                                      | 8                           | 2.1      | 2                       | 2.6      |
| <b>Median tumor size, mm (min-max)</b>          | 100                         | (18-400) | 110                     | (35-300) |
| <b>Median mitotic index /50HPF (min-max)</b>    | 11                          | (0-350)  | 10                      | (0-200)  |
| <b>Mutational status</b>                        |                             |          |                         |          |
| KIT Exon 11                                     | 233                         | 60.7     | 43                      | 55.8     |
| KIT Exon 9                                      | 39                          | 10.2     | 2                       | 2.6      |
| PDGFRa Exon 18 D842V                            | 12                          | 3.1      | 4                       | 5.2      |
| Wild type                                       | 38                          | 9.9      | 8                       | 10.4     |
| Other                                           | 21                          | 5.5      | 8                       | 10.4     |
| NA                                              | 41                          | 10.7     | 12                      | 15.6     |
| <b>Metastasis</b>                               |                             |          |                         |          |
| Synchronous                                     | 212                         | 55.2     | 32                      | 41.6     |
| Metachronous                                    | 172                         | 44.8     | 45                      | 58.4     |
| <b>Number of metastatic sites</b>               |                             |          |                         |          |
| Monosite                                        | 295                         | 76.8     | 56                      | 72.7     |
| Multisite                                       | 89                          | 23.2     | 21                      | 27.3     |
| <b>Locoregional procedure of metastases</b>     |                             |          |                         |          |
| Yes                                             | 185                         | 48.2     | 42                      | 54.5     |

|    | Imatinib<br>(n=384) |      | Other<br>(n=77) |      |
|----|---------------------|------|-----------------|------|
|    | n                   | %    | n               | %    |
| No | 199                 | 51.8 | 35              | 54.5 |

**Supplementary Table S2.** Prognostic factors associated with OS in univariate analysis.

| Clinical and molecular factors            | Pvalue<br>(khi-2) | Hazard<br>Ratio | HR Lower<br>Conf. Limit | HR Upper<br>Conf. Limit |
|-------------------------------------------|-------------------|-----------------|-------------------------|-------------------------|
| <b>Sex</b>                                |                   |                 |                         |                         |
| Female vs Male                            | 0.038             | 0.76            | 0.59                    | 0.99                    |
| <b>Age at diagnosis, years</b>            |                   |                 |                         |                         |
| > 60 vs < 60                              | <.001             | 1.59            | 1.24                    | 2.03                    |
| <b>Tumor site</b>                         | 0.179             |                 |                         |                         |
| Colon vs Stomach                          | 0.873             | 0.94            | 0.44                    | 2.02                    |
| Duodenum vs Stomach                       | 0.027             | 1.76            | 1.07                    | 2.91                    |
| Oesophagus vs Stomach                     | 0.413             | 1.46            | 0.59                    | 3.58                    |
| Peritoneum vs Stomach                     | 0.059             | 1.74            | 0.98                    | 3.11                    |
| Rectum vs Stomach                         | 0.795             | 0.93            | 0.52                    | 1.65                    |
| Small intestine vs Stomach                | 0.801             | 1.04            | 0.79                    | 1.37                    |
| <b>Tumor size (continuous)</b>            | 0.411             | 1.00            | 1.00                    | 1.00                    |
| <b>Mitotic Index /50 HPF (continuous)</b> | <.001             | 1.01            | 1.00                    | 1.01                    |
| <b>Miettinen AFIP scoring</b>             | 0.299             |                 |                         |                         |
| Intermediate risk vs High risk            | 0.110             | 0.73            | 0.50                    | 1.07                    |
| Low and very low risk vs High risk        | 0.517             | 0.78            | 0.37                    | 1.66                    |
| NA/Missing vs High risk                   | 0.530             | 1.13            | 0.78                    | 1.64                    |
| <b>Mutational status</b>                  | 0.226             |                 |                         |                         |
| Exon 18 vs Exon 11                        | 0.707             | 1.13            | 0.61                    | 2.09                    |
| Exon 9 vs Exon 11                         | 0.025             | 1.63            | 1.06                    | 2.50                    |
| Other vs Exon 11                          | 0.833             | 1.07            | 0.58                    | 1.97                    |
| Wild type vs Exon 11                      | 0.088             | 1.41            | 0.95                    | 2.09                    |
| NA vs Exon 11                             | 0.453             | 1.15            | 0.80                    | 1.66                    |
| <b>Metastasis at diagnosis</b>            |                   |                 |                         |                         |
| Yes vs No                                 | 0.715             | 0.96            | 0.75                    | 1.22                    |
| <b>Surgery of tumour (primary event)</b>  |                   |                 |                         |                         |
| Yes vs No                                 | <.001             | 0.46            | 0.33                    | 0.65                    |
| <b>Tumour spillage (primary event)</b>    | 0.704             |                 |                         |                         |
| Yes vs No                                 | 0.880             | 1.03            | 0.71                    | 1.49                    |
| NA vs No                                  | 0.432             | 0.85            | 0.57                    | 1.27                    |
| <b>Margin R (primary event)</b>           | 0.004             |                 |                         |                         |
| R1 vs R0                                  | 0.059             | 1.40            | 0.99                    | 1.99                    |
| R2 vs R0                                  | 0.001             | 2.42            | 1.43                    | 4.11                    |
| NA vs R0                                  | 0.349             | 0.79            | 0.49                    | 1.29                    |

|                                                                                |       |      |      |      |
|--------------------------------------------------------------------------------|-------|------|------|------|
| <b>Status at referral</b>                                                      |       |      |      |      |
| Relapse vs First event                                                         | 0.733 | 1.05 | 0.81 | 1.35 |
| <b>Participated in a clin. trial in palliative care in 1<sup>st</sup> line</b> |       |      |      |      |
| Yes vs No                                                                      | 0.159 | 0.83 | 0.65 | 1.07 |
| <b>Participated at least once in a clin. trial in palliative care</b>          |       |      |      |      |
| Yes vs No                                                                      | 0.404 | 1.13 | 0.85 | 1.49 |
| Missing vs No                                                                  | 0.506 | 1.27 | 0.63 | 2.53 |
| <b>Loco-regional treatment of metastasis</b>                                   |       |      |      |      |
| Yes vs No                                                                      | <.001 | 0.56 | 0.44 | 0.72 |
| <b>Periods of TKI access</b>                                                   |       |      |      |      |
| (< 2002) Imatinib vs post 2014                                                 | 0.183 |      |      |      |
|                                                                                | 0.534 | 0.80 | 0.40 | 1.60 |
| 2002-2006 Sunitinib vs post 2014                                               | 0.796 | 0.92 | 0.47 | 1.79 |
| 2007-2014 Regorafenib vs post 2014                                             | 0.658 | 1.15 | 0.61 | 2.18 |

NA : not available

**Supplementary Table S3.** Prognostic factors associated with TNT in first line in univariate analysis.

| Clinical and molecular factors           | Pvalue<br>(khi-2) | Hazard<br>Ratio | HR Lower<br>Conf. Limit | HR Upper<br>Conf. Limit |
|------------------------------------------|-------------------|-----------------|-------------------------|-------------------------|
| <b>Sex</b>                               |                   |                 |                         |                         |
| Female vs Male                           | 0.233             | 0.88            | 0.71                    | 1.09                    |
| <b>Age at diagnosis, years</b>           |                   |                 |                         |                         |
| > 60 vs < 60                             | 0.037             | 1.25            | 1.01                    | 1.55                    |
| <b>Tumor site</b>                        | 0.608             |                 |                         |                         |
| Colon vs Stomach                         | 0.913             | 0.97            | 0.52                    | 1.79                    |
| Duodenum vs Stomach                      | 0.462             | 1.20            | 0.74                    | 1.93                    |
| Oesophagus vs Stomach                    | 0.807             | 0.90            | 0.40                    | 2.05                    |
| Peritoneum vs Stomach                    | 0.068             | 1.62            | 0.97                    | 2.72                    |
| Rectum vs Stomach                        | 0.575             | 1.15            | 0.70                    | 1.88                    |
| Small intestine vs Stomach               | 0.879             | 0.98            | 0.78                    | 1.24                    |
| <b>Tumor size (continuous)</b>           | 0.636             | 1.00            | 1.00                    | 1.00                    |
| <b>Mitotic Index /50HPF (continuous)</b> | 0.037             | 1.00            | 1.00                    | 1.01                    |
| <b>Miettinen AFIP scoring</b>            | 0.120             |                 |                         |                         |
| Intermediate risk vs High risk           | 0.431             | 0.88            | 0.64                    | 1.21                    |
| Low risk/very low vs High risk           | 0.025             | 0.47            | 0.24                    | 0.91                    |
| NA vs High risk                          | 0.675             | 1.07            | 0.77                    | 1.49                    |
| <b>Mutational status</b>                 | 0.005             |                 |                         |                         |
| Exon 18 vs Exon 11                       | 0.045             | 1.62            | 1.01                    | 2.59                    |
| Exon 9 vs Exon 11                        | 0.055             | 1.45            | 0.99                    | 2.13                    |
| Other vs Exon 11                         | 0.403             | 1.24            | 0.75                    | 2.07                    |
| Wild type vs Exon 11                     | 0.006             | 1.62            | 1.15                    | 2.28                    |
| NA vs Exon 11                            | 0.011             | 1.52            | 1.10                    | 2.11                    |
| <b>Metastasis at diagnosis</b>           |                   |                 |                         |                         |
| Yes vs No                                | 0.916             | 1.01            | 0.82                    | 1.25                    |
| <b>Surgery of tumour (primary event)</b> |                   |                 |                         |                         |
| Yes vs No                                | <.001             | 0.59            | 0.44                    | 0.79                    |
| <b>Tumour spillage (primary event)</b>   | 0.498             |                 |                         |                         |
| Yes vs No                                | 0.241             | 1.21            | 0.88                    | 1.68                    |
| NA vs No                                 | 0.737             | 1.06            | 0.76                    | 1.48                    |
| <b>Margin R (primary event)</b>          | 0.001             |                 |                         |                         |
| R1 vs R0                                 | 0.237             | 1.22            | 0.88                    | 1.68                    |
| R2 vs R0                                 | <.001             | 2.50            | 1.53                    | 4.10                    |

|                                                                                |       |      |      |      |
|--------------------------------------------------------------------------------|-------|------|------|------|
| NA vs R0                                                                       | 0.143 | 0.73 | 0.48 | 1.11 |
| <b>Status At Referral</b>                                                      |       |      |      |      |
| Relapse vs First event                                                         | 0.453 | 1.09 | 0.87 | 1.36 |
| <b>Participated in a clin. trial in palliative care in 1<sup>st</sup> line</b> |       |      |      |      |
| Yes vs No                                                                      | 0.027 | 0.78 | 0.63 | 0.97 |
| <b>Participated at least once in a clin. trial in palliative care</b>          |       |      |      |      |
| Yes vs No                                                                      | 0.010 | 1.34 | 1.07 | 1.68 |
| <b>Loco-regional treatment of metastasis</b>                                   |       |      |      |      |
| Yes vs No                                                                      | 0.002 | 0.71 | 0.58 | 0.88 |
| <b>Periods of TKI access</b>                                                   |       |      |      |      |
| (< 2002) Imatinib vs post 2014                                                 | 0.283 | 1.26 | 0.82 | 1.94 |
| 2002-2006 Sunitinib vs post 2014                                               | 0.565 | 0.88 | 0.58 | 1.34 |
| 2007-2014 Regorafenib vs post 2014                                             | 0.868 | 1.03 | 0.71 | 1.51 |
| NA : not available                                                             |       |      |      |      |



**Supplementary Table S4.** Prognostic factors associated with OS in univariate analysis for synchronous metastatic patients (n = 259).

| Clinical and molecular factors            | Pvalue<br>(khi-2) | Hazard<br>Ratio | HR Lower<br>Conf.<br>Limit | HR Upper<br>Conf.<br>Limit |
|-------------------------------------------|-------------------|-----------------|----------------------------|----------------------------|
| <b>Sex</b>                                |                   |                 |                            |                            |
| Female vs Male                            | 0.178             | 0.78            | 0.55                       | 1.12                       |
| <b>Age at diagnosis, years</b>            |                   |                 |                            |                            |
| > 60 vs < 60                              | 0.017             | 1.52            | 1.08                       | 2.15                       |
| <b>Tumor site</b>                         | 0.444             |                 |                            |                            |
| Colon vs Stomach                          | 0.244             | 1.73            | 0.69                       | 4.35                       |
| Duodenum vs Stomach                       | 0.212             | 1.66            | 0.75                       | 3.65                       |
| Oesophagus vs Stomach                     | 0.218             | 2.44            | 0.59                       | 10.07                      |
| Peritoneum vs Stomach                     | 0.104             | 1.72            | 0.90                       | 3.30                       |
| Rectum vs Stomach                         | 0.977             | 0.99            | 0.42                       | 2.30                       |
| Small intestine vs Stomach                | 0.603             | 1.11            | 0.75                       | 1.64                       |
| <b>Tumor size (continuous)</b>            | 0.296             | 1.00            | 1.00                       | 1.00                       |
| <b>Mitotic Index /50 HPF (continuous)</b> | 0.026             | 1.00            | 1.00                       | 1.01                       |
| <b>Miettinen AFIP scoring</b>             | 0.185             |                 |                            |                            |
| Intermediate risk vs High risk            | 0.153             | 0.67            | 0.39                       | 1.16                       |
| Low and very low risk vs High risk        | 0.371             | 0.63            | 0.23                       | 1.72                       |
| NA/Missing vs High risk                   | 0.257             | 1.30            | 0.83                       | 2.04                       |
| <b>Mutational status**</b>                | 0.033             |                 |                            |                            |
| Exon 18 vs Exon 11                        | 0.106             | 0.31            | 0.08                       | 1.28                       |
| Exon 9 vs Exon 11                         | 0.022             | 1.83            | 1.09                       | 3.06                       |
| Other vs Exon 11                          | 0.349             | 0.51            | 0.13                       | 2.08                       |
| Wild type vs Exon 11                      | 0.247             | 1.45            | 0.77                       | 2.74                       |
| Na vs Exon 11                             | 0.095             | 1.50            | 0.93                       | 2.42                       |
| <b>Surgery of tumour (primary event)</b>  |                   |                 |                            |                            |
| Yes vs No                                 | <.001             | 0.46            | 0.33                       | 0.65                       |
| <b>Tumour spillage (primary event)</b>    | 0.704             |                 |                            |                            |
| Yes vs No                                 | 0.880             | 1.03            | 0.71                       | 1.49                       |
| NA vs No                                  | 0.432             | 0.85            | 0.57                       | 1.27                       |
| <b>Margin R (primary event)</b>           | 0.004             |                 |                            |                            |
| R1 vs R0                                  | 0.084             | 1.62            | 0.94                       | 2.80                       |

|                                                                                |       |      |      |      |
|--------------------------------------------------------------------------------|-------|------|------|------|
| R2 vs R0                                                                       | <.001 | 3.10 | 1.68 | 5.71 |
| NA vs R0                                                                       | 0.844 | 1.07 | 0.53 | 2.16 |
| <b>Status at referral</b>                                                      |       |      |      |      |
| Relapse vs First event                                                         | 0.544 | 0.86 | 0.52 | 1.41 |
| <b>Participated in a clin. trial in palliative care in 1<sup>st</sup> line</b> |       |      |      |      |
| Yes vs No                                                                      | 0.150 | 0.77 | 0.53 | 1.10 |
| <b>Participated at least once in a clin. trial in palliative care</b>          |       |      |      |      |
| Yes vs No                                                                      | 0.655 | 1.09 | 0.75 | 1.57 |
| Missing vs No                                                                  | 0.780 | 0.85 | 0.26 | 2.73 |
| <b>Loco-regional treatment of metastasis</b>                                   |       |      |      |      |
| Yes vs No                                                                      | 0.006 | 0.62 | 0.44 | 0.87 |
| <b>Periods of TKI access</b>                                                   |       |      |      |      |
| (< 2002) Imatinib vs post 2014                                                 | 0.948 | 0.97 | 0.40 | 2.34 |
| 2002-2006 Sunitinib vs post 2014                                               | 0.725 | 1.16 | 0.50 | 2.70 |
| 2007-2014 Regorafenib vs post 2014                                             | 0.502 | 1.32 | 0.59 | 2.94 |

\*\* The proportionality assumption required for the application of a cox PH model does not hold.

NA : not available
